# Supplementary material for: A photochemically initiated chemistry for coupling underivatized carbohydrates to gold nanoparticles
Source: Royal Society of Chemistry journal article supplement (doi:10.1039/b917900c), 2009-01-01
Supplement: b917900c.pdf [file b917900c.pdf]

## Supplementary Information

### A photochemically initiated chemistry for coupling underivatized carbohydrates to gold nanoparticles

Xin Wang,<sup>a</sup> Olof Ramström,<sup>\*a,b</sup> Mingdi Yan<sup>\*a</sup>

<sup>a</sup>Department of Chemistry, Portland State University, P.O. Box 751, Portland, Oregon, 97207-0751;

<sup>b</sup>Department of Chemistry, KTH - Royal Institute of Technology, Teknikringen 30, S-10044 Stockholm, Sweden

#### 1. Mannose density measurement

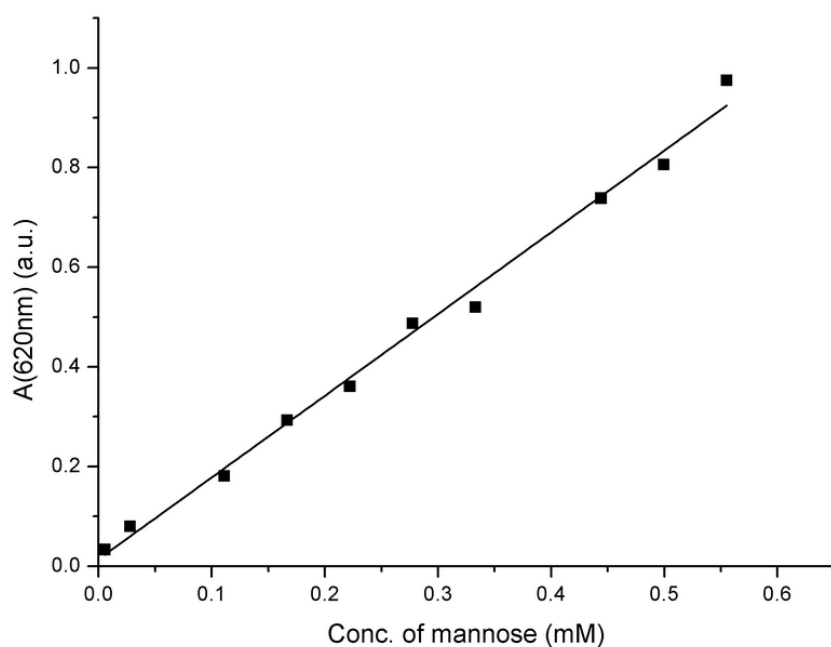

**Figure 1S.** Calibration curve obtained by treating various concentrations of D-mannose with anthrone/sulfuric acid and measuring the absorption at 620 nm.

## 2. Characterization of PFPA-functionalized and manno-bose-conjugated Au NPs

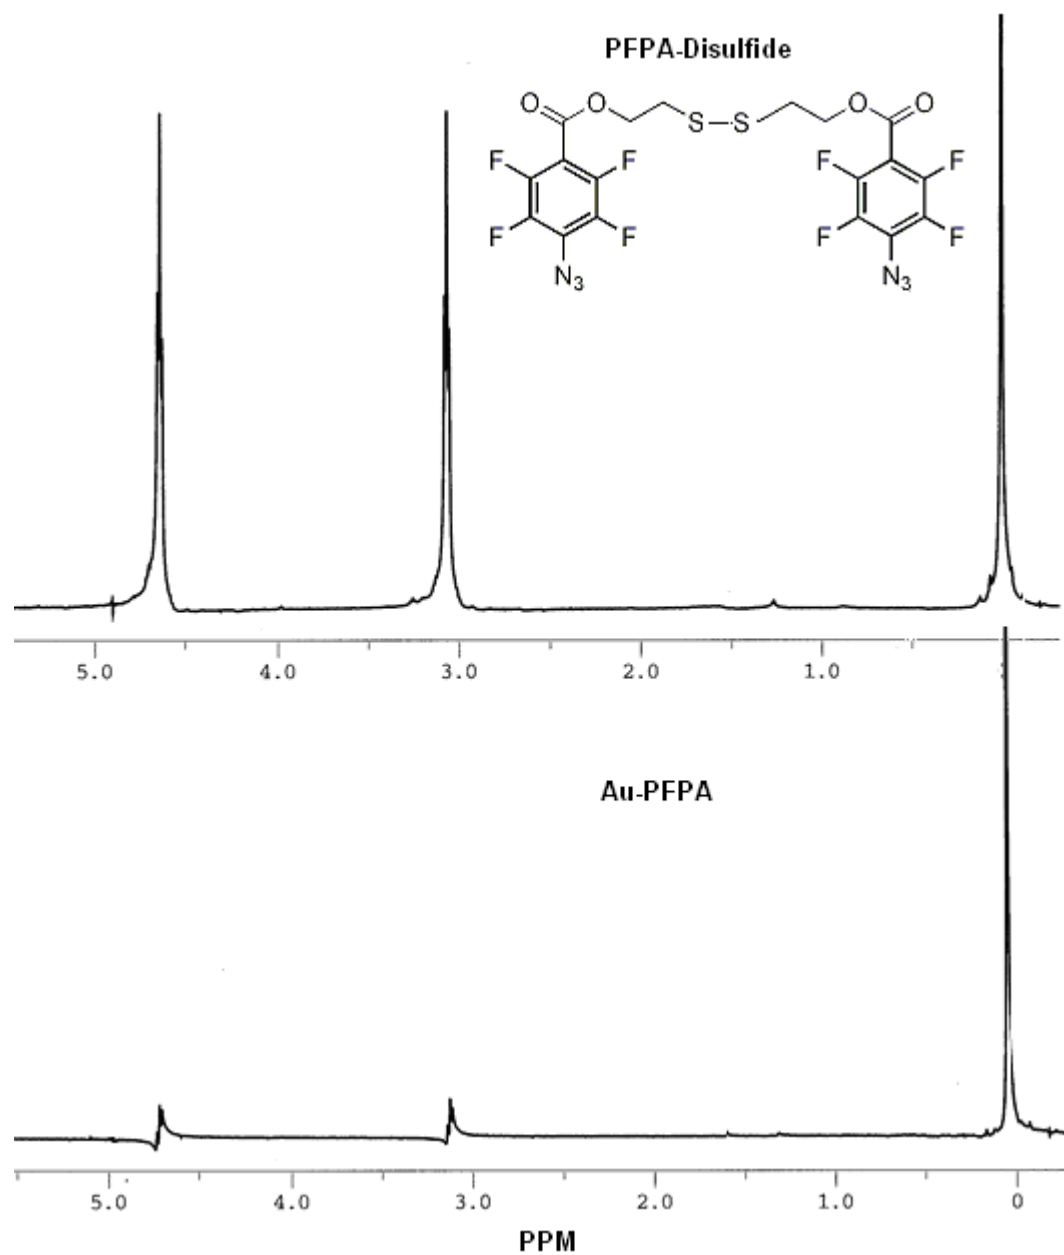

**Figure 2S.** <sup>1</sup>H NMR spectra of PFPA-disulfide **1** and gold nanoparticles functionalized with PFPA-disulfide **1** (Au-PFPA) in CDCl<sub>3</sub> with TMS ( $\delta$  0.0 ppm).

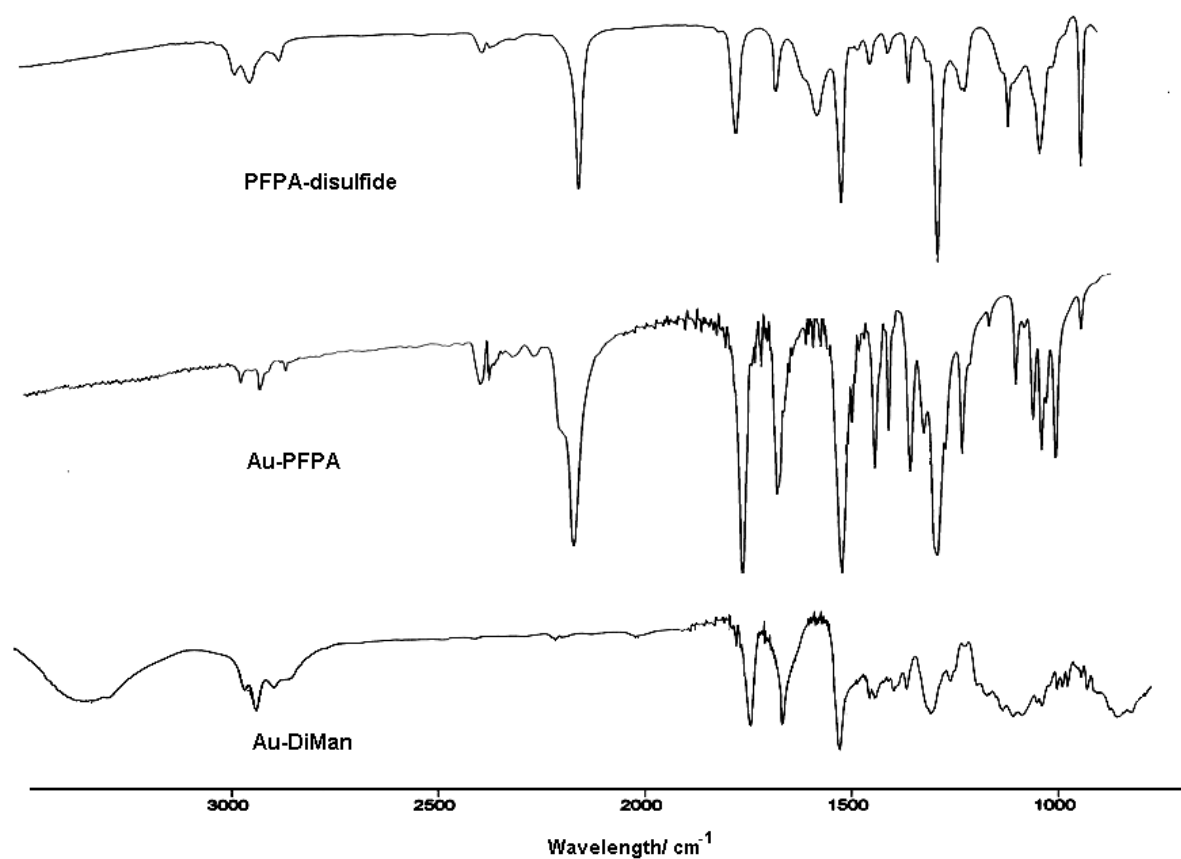

**Figure 3S.** FT-IR spectra of PFPA-disulfide **1**, gold nanoparticles functionalized with PFPA-disulfide **1** (Au-PFPA), and Au NPs subsequently coupled with  $\alpha$ -1,4-mannobiose (Au-DiMan). The azide ( $-\text{N}_3$ ) absorption at  $\sim 2125 \text{ cm}^{-1}$  disappeared after light activation.

### 3. Calculation of D-mannose density on Au NP

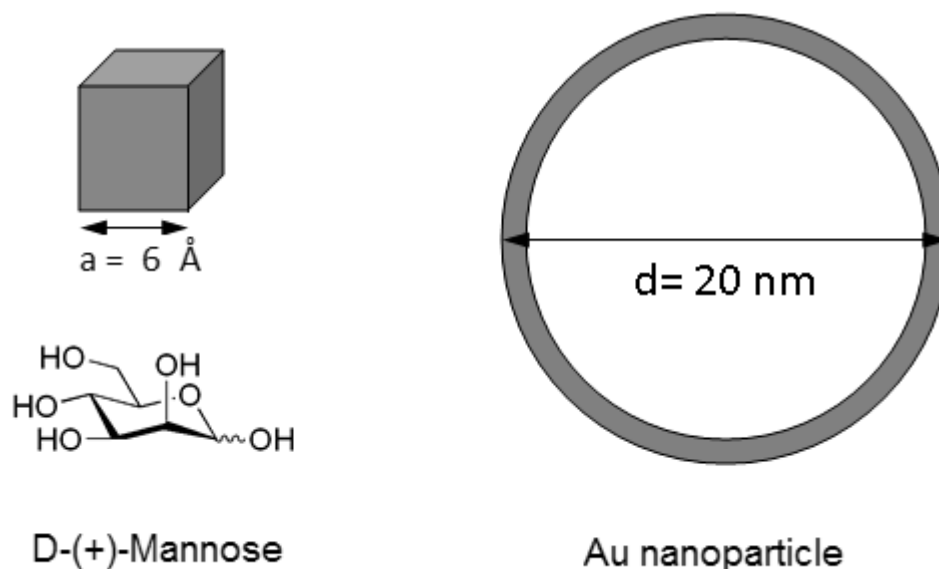

**Figure 4S.** D- mannose molecules and Au NPs

The maximal number of D-mannose molecules on each Au NP is calculated as follows.

Assuming that D-mannose occupies in space by taking the shape of a square, each side of the square is measured to be  $\sim 6 \text{ \AA}$  by Chem 3D (CambridgeSoft., Ultra, version 9.0).

The D-mannose molecule is then projected to the surface, and the surface area of each D-mannose molecule is  $36 \text{ \AA}^2$ .

The surface area of one 20-nm Au NP is  $1.26 \times 10^5 \text{ \AA}^2 (= 4\pi \times 100^2)$ .

The maximal number of D-mannose molecules occupying the surface of one Au NP in a closely packed manner is  $3.50 \times 10^3 (= 1.26 \times 10^5 \text{ \AA}^2 / 36 \text{ \AA}^2)$ , corresponding to  $5.81 \times 10^{-12} \text{ nmol} [= 3.50 \times 10^3 / (6.02 \times 10^{23}) \times 10^9]$ .

Assuming that the density of Au NPs equals to that of gold ( $19.3 \text{ g/cm}^3$ ), the weight of each 20-nm Au NP is  $8.08 \times 10^{-14} \text{ mg} (= 19.3 \times (4/3 \pi \times 10^3) \times 10^{-21} \times 10^3)$ .

The number of Au NPs in 1 mg of Au NPs is  $1.24 \times 10^{13} (= 1/8.08 \times 10^{-14})$ , which is equivalent to  $0.0206 \text{ nmol} (= 1.24 \times 10^{13} / (6.02 \times 10^{23}) \times 10^9)$

The theoretical maximal amount (mole) of D-mannose on 1 mg Au NP is  $72.0 \text{ nmol} (= 5.81 \times 10^{-12} \times (1.24 \times 10^{13}))$ .

The D-mannose density of Au NP coated was measured to  $24.1 \pm 1.7 \text{ nmol/mg Au NPs}$ . Therefore, the number of D-mannose molecules on each 20-nm Au NP is  $\sim 1.17 \times 10^3 (= 24.1/0.0206)$ .

The surface coverage, ie measured/theoretical, is  $33.4\% (= 1.17 \times 10^3 / (3.50 \times 10^3))$

#### 4. Control experiments

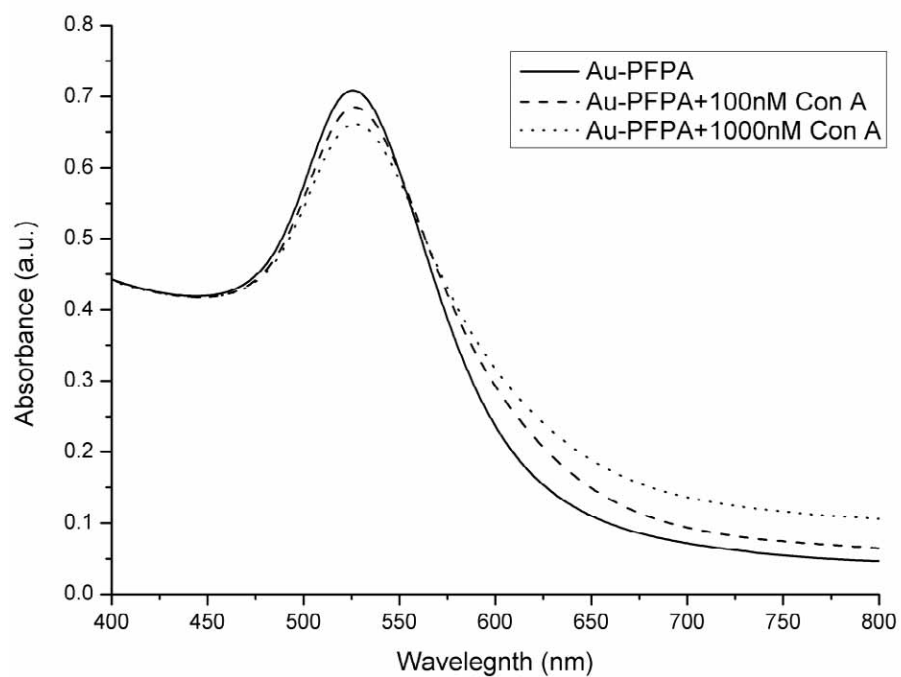

**Figure 5S.** UV-vis spectra of PFPA-functionalized Au NPs and after treating with 100 nM and 1000 nM Con A.
